# Supplementary material for: MEG Node Degree for Focus Localization: Comparison with Invasive EEG
Source: MDPI journal article supplement (doi:10.3390/biomedicines11020438), 2023-02-02

**Supplementary Figure S1.** Full node degree distributions without thresholding for example case shown in figure 1. For delta, parcellated distribution is shown, as used for the statistical analysis.

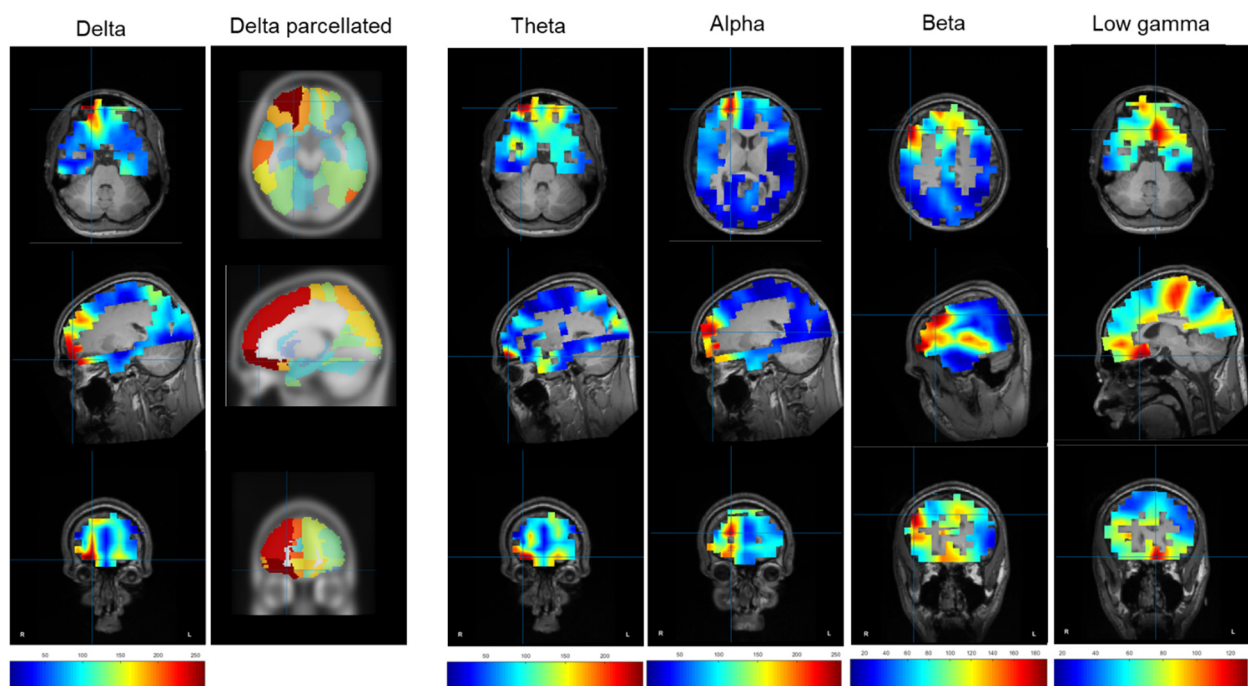

Supplement: s1 [file s1]
